# Supplementary material
Source: MDPI journal article supplement (https://www.mdpi.com/1996-1073/11/2/366)

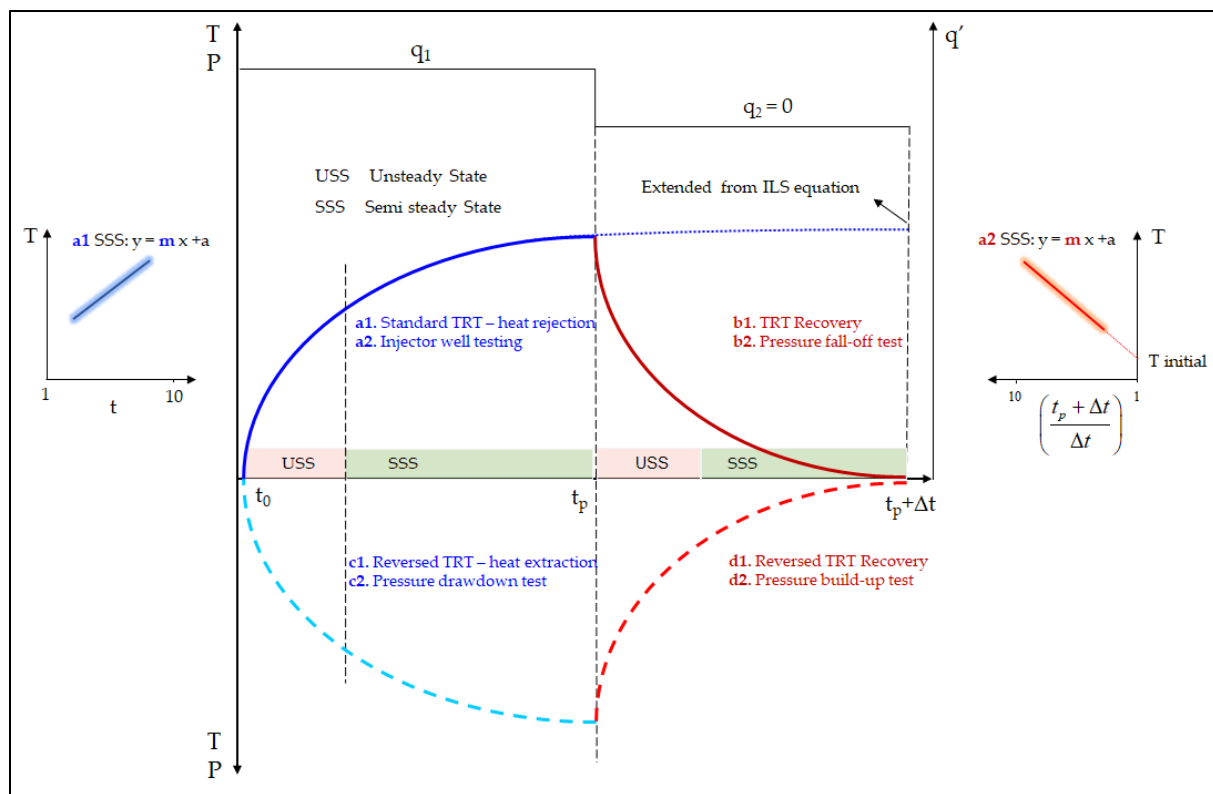

Supplement: s1 [file s1]
